# Supplementary material for: Evolution of CONSTANS Regulation and Function after Gene Duplication Produced a Photoperiodic Flowering Switch in the Brassicaceae
Source: PubMed Central journal article supplement — Mol Biol Evol. 2015 May 13;32(9):2284–301. doi: 10.1093/molbev/msv110 (PMC4540966; doi:10.1093/molbev/msv110), 2015-05-13

# Supplementary Figures and Tables

## Supplementary Tables

Supplementary Table 1: Primer used for RT-PCR

| Gene (gene identifier)              | Name        | Sequence                    |
|-------------------------------------|-------------|-----------------------------|
| <i>PP2A</i><br>(AT1G69960)          | PP2a Fw     | CAGCAACGAATTGTGTTTGG        |
|                                     | PP2a Rv     | AAATACGCCCAACGAACAAA        |
| <i>Actin</i>                        | Actin Fw    | GGTAACATTGTGCTCAGTGGTGG     |
|                                     | Actin Rv    | AACGACCTTAATCTTCATGCTGC     |
| <i>LUC</i>                          | LUC Fw      | AAGCGGTTGCCAAGAGGTTC        |
|                                     | LUC Rv      | CGCGCCCGTTTATCATC           |
| <i>CO 5'UTR Fw</i><br>(AT5G15840)   | CO UTR Fw   | CAGATACCAGCTCCCACACC        |
| <i>SUC2 5'UTR Fw</i><br>(AT1G22710) | SUC2 UTR Fw | GCGAGCTTAAATGGCATAACC       |
| <i>3x HA Tag Rv</i>                 | HA Rv       | ATAGTCCGGGACGTCATAGG        |
| <i>FT</i><br>(AT1G65480)            | FT Fw       | CGAGTAACGAACGGTGATGA        |
|                                     | FT Rv       | CGCATCACACACTATATAAGTAAAACA |
| <i>AtCO</i><br>(AT5G15840)          | CO Fw       | TAAGGATGCCAAGGAGGTTG        |
|                                     | CO Rv       | CCCTGAGGAGCCATATTTGA        |
| <i>AtCOL1</i><br>(AT5G15850)        | COL1 Fw     | CACCTTACCCTCCAGCTCAG        |
|                                     | COL1 Rv     | GTGGAGAAAGCTTGTTTGC         |
| <i>AtCOL2</i><br>(AT3G02380)        | COL2 Fw     | CCAGGGAAAAACATCGGTAA        |
|                                     | COL2 Rv     | TTTTGTTGGCTTTGTTGCAG        |
| <i>ThCOL</i>                        | ThCOL Fw    | CGCTAACCCACTCGCTAGAC        |
|                                     | ThCOL Rv    | CGTCCTCATCTTCAGCTTCC        |
| <i>AeCO</i>                         | AeCO Fw     | AAGGCAGACAACGCATCTCT        |
|                                     | AeCO Rv     | TCTGTTGTCGCTCTTTGCTG        |
| <i>AeCOL2</i>                       | AeCOL2 Fw   | GCCTGTGATGCAGAGATTCA        |
|                                     | AeCOL2 Rv   | TCCATTATCTGCATCCGTGA        |

Supplementary Table 2: Accession numbers for protein sequences used for phylogenetic comparison (Fig 3B)

| Protein | Reference Number                                         | Database      |
|---------|----------------------------------------------------------|---------------|
| CO      | NP_197088.1                                              | NCBI          |
| COL1    | NP_197089.1                                              | NCBI          |
| COL2    | NP_186887.1                                              | NCBI          |
| BrCO    | XP_009121540.1                                           | NCBI          |
| BrCOL1  | XP_009126071.1                                           | NCBI          |
| BrCOL1  | CDX69493.1                                               | GenBank       |
| BrCOL2  | XP_009117976.1                                           | NCBI          |
| BrCOL2  | XP_009134666.1                                           | NCBI          |
| BsCO    | Bostr.2902s0319.1                                        | Phytozome 10  |
| BsCOL1  | Bostr.2902s0320.1                                        | Phytozome 10  |
| BsCOL2  | Bostr.1460s0153.1                                        | Phytozome 10  |
| EsCO    | EUTSA_v10015486mg                                        | NCBI          |
| EsCOL1  | EUTSA_v10013895mg                                        | NCBI          |
| CrCO    | CARUB_v10001192mg                                        | NCBI          |
| CrCOL1  | CARUB_v10001279mg                                        | NCBI          |
| CrCOL2  | CARUB_v10015501mg                                        | NCBI          |
| AeCO    | KE151199.1 (725253 to 726038 + 726241 to 726582)         | GenBank (DNA) |
| AeCOL2  | KE150775.1 (459607 to 460401 + 459171 to 459533)         | GenBank (DNA) |
| AaCO    | CM002876.1 (10849443 to 10850180 + 10848784 to 10849146) | GenBank (DNA) |
| AaCOL1  | CM002876.1 (10853658 to 10854716)                        | GenBank (DNA) |
| AaCOL2  | CM002871.1 (740879 to 741850)                            | GenBank (DNA) |
| ThCOL   | ABD96940.1                                               | GenBank       |
| CpCO    | DS981590.1 (73183..73953,74563..74934)                   | Genbank (DNA) |

Supplementary Table 3: Accession numbers for Brassicaceae CO Promoter sequences (Fig. 4A, suppl. Fig. 4A)

| Species                      | Length [bp] | Reference number | Location /position   |
|------------------------------|-------------|------------------|----------------------|
| <i>Aethionema arabicum</i>   | [3179]      | KE151199.1       | 722079 to 725255     |
| <i>Arabidopsis thaliana</i>  | [3603]      | CP002688.1       | 5172695 to 5176297   |
| <i>Arabidopsis lyrata</i>    | [3558]      | NW_003302550.1   | 6468343 to 6471900   |
| <i>Arabis alpina</i>         | [3477]      | CM002876.1       | 10850178 to 10853654 |
| <i>Brassica napus</i>        | [2872]      | CM002768.1       | 16635884 to 16638739 |
| <i>Brassica oleracea</i>     | [4827]      | AM295778.1       | 1835 to 6661         |
| <i>Capsella rubella</i>      | [3756]      | KP347978         |                      |
| <i>Nasturtium officinale</i> | [2937]      | KP347979         |                      |
| <i>Sisymbrium irio</i>       | [3366]      | AC240101.1       | 52211 to 55576       |
| <i>Sisymbrium officinale</i> | [3322]      | KP347980         |                      |

Supplementary Table 4: Accession numbers of putative promoter sequences used for *cis*-element comparison (Fig. 4B-D, suppl. Fig. 4B-D) (length: 4000bp)

| Promoter Sequence | Species                     | Reference number | Position             |
|-------------------|-----------------------------|------------------|----------------------|
| <i>pAeCO</i>      | <i>Aethionema arabicum</i>  | KE151199.1       | 721256 to 725255     |
| <i>pAeCOL2</i>    |                             | KE150775.1       | 460399 to 464400     |
| <i>pCO</i>        | <i>Arabidopsis thaliana</i> | NC_003076.8      | 5172695 to 5176694   |
| <i>pCOL1</i>      |                             | NC_003076.8      | 5177471 to 5181470   |
| <i>pCOL2</i>      |                             | NC_003074.8      | 488622 to 492621     |
| <i>pAaCO</i>      | <i>Arabis alpina</i>        | CM002876.1       | 10850178 to 10854177 |
| <i>pAaCOL1</i>    |                             | CM002876.1       | 10854714 to 10858713 |
| <i>pAaCOL2</i>    |                             | CM002871.1       | 741848 to 745873     |
| <i>pBrCO</i>      | <i>Brassica rapa</i>        | NC_024804.1      | 13313898 to 13317897 |
| <i>pBrCOL1</i>    |                             | NC_024804.1      | 13309689 to 13313688 |
| <i>pBrCOL1</i>    |                             | NC_024796.1      | 3860236 to 3864235   |
| <i>pBrCOL2</i>    |                             | NC_024795.1      | 25142738 to 25146737 |
| <i>pBrCOL2</i>    |                             | NC_024797.1      | 14514058 to 14518057 |
| <i>pEsCO</i>      | <i>Eutrema parvulum</i>     | CM001192.1       | 13405655 to 13409654 |
| <i>pEsCOL1</i>    |                             | CM001192.1       | 13401161 to 13405160 |
| <i>pEsCOL2</i>    |                             | CM001189.1       | 463764 to 467763     |
| <i>pMtCOLa</i>    | <i>Medicago truncatula</i>  | NC_016413.1      | 5837084 to 5841083   |
| <i>pPtCOL1</i>    | <i>Populus trichocarpa</i>  | NC_008483.2      | 14471166 to 14475165 |
| <i>pPtCOL2</i>    |                             | NC_008470.2      | 9352675 to 9356674   |
| <i>pStCOL1</i>    | <i>Solanum tuberosum</i>    | NW_006238930.1   | 968883 to 972882     |
| <i>pStCOL2</i>    | <i>Solanum tuberosum</i>    | NW_006238930.1   | 958533 to 962532     |
| <i>pThCOL</i>     | <i>Tarenaya hassleriana</i> | KE706297.1       | 4355966 to 4360215   |
| <i>pVvCO</i>      | <i>Vitis vinifera</i>       | NW_003724108.1   | 776848 to 780847     |

Supplementary Table 5: Accession numbers of *COL* loci used for phylogenetic analysis (Fig. 6C):

| Locus [length bp]    | Species                     | Reference number | Position           |
|----------------------|-----------------------------|------------------|--------------------|
| <i>AeCO</i> [4900]   | <i>Aethionema arabicum</i>  | KE151199.1       | 723739 to 728638   |
| <i>AeCOL2</i> [5284] |                             | KE150775.1       | 456692 to 461975   |
| <i>CO</i> [4794]     | <i>Arabidopsis thaliana</i> | NC_003076.8      | 5169362 to 5174155 |
| <i>COL1</i> [4897]   |                             | NC_003076.8      | 5174156 to 5179052 |
| <i>COL2</i> [4532]   |                             | NC_003074.8      | 485615 to 490146   |
| <i>ThCOL</i> [5378]  | <i>Tarenaya hassleriana</i> | KE706297.1       | 4352092 to 4357468 |

## Supplementary Figure Legends

### Supplementary Figure 1

A) Phylogenetic relationships of species from the order Brassicales. The Brassicaceae family can be divided in two major lineages, the core Brassicaceae and the *Aethionema* lineage, here represented by *Aethionema arabicum*. *Tarenaya hassleriana* (formerly *Cleome hassleriana*) belongs to the Cleomaceae family, which is the sister family of the Brassicaceae. Independent whole genome polyploidization (WGD) events (At- $\alpha$  and Th- $\alpha$ , asterisks) occurred in both families. At, *Arabidopsis thaliana*, Th, *Tarenaya hassleriana* (Bailey et al. 2006; Franzke et al. 2011; Cheng et al. 2013; Haudry et al. 2013).

### Supplementary Figure 2

*A. thaliana co-10* null mutant was complemented with cDNA of *COL1*, *COL2*, *AeCO*, *AeCOL2* and *ThCOL* expressed from *pSUC2* (A) or *pCO* (B). Flowering time (total leaf number +/- SD) was examined using independent transgenic plants ( $T_1$ ) grown in LD conditions. *wt*, *co-10* and homozygous *pCO::HA:CO* (#1) and *pSUC2::HA:CO* (#3) single lines are shown as controls (n=12). Asterisks (\*\*) indicate statistically significantly earlier flowering ( $p < 0.001$ ) compared to Col-0 (*wt*).

C-F) Expression levels of the transgene (5'UTR-3xHA, C,E) and *FT* (D,F) in homozygous lines expressing subgroup Ia *COL* genes from *pSUC2* (C,D) or *pCO* (E,F) as used for flowering determination in Fig. 3C,D. Mean +/- SD of two biological experiments after normalization to *PP2A* levels except *pCO::3xHA:ThCOL* #9 which is single experiment.

### Supplementary Figure 3

A) Sequence alignment (amino acids) of B-Box1, B-Box2 and CCT domain from subgroup Ia *COL* proteins used in Fig. 3B. Amino acids that are conserved in all *COL* orthologs but different in *CO* orthologs are indicated (v + AA number in *CO*). Asterisks indicate conserved amino acids. Gene identifier or protein prediction is indicated (see Material and Methods, suppl. Table 2).

B) Synonymous ( $d_s$ ) and non-synonymous ( $d_n$ ) substitution rates and ratio ( $d_n/d_s$ ) corrected by Jukes-Cantor method in pairwise comparison of subgroup Ia *COL* genes from *A. thaliana*, *A. arabicum* and *T. hassleriana*.

C) Model for the evolutionary history of *CO*, *COL1* and *COL2* in the Brassicaceae and *T. hassleriana COL*.

D) Spatial expression (GUS signal) conferred by *pCO*, *pCOL1* and *pCOL2* in 14 day old seedlings grown in LD conditions. Bar, 2mm.

#### Supplementary Figure 4

A) VISTA plot as displayed in Fig. 4A but with *A. thaliana CO* promoter as the base sequence.

B-D) Mean abundance of three putative *cis*-elements in *CO* promoters as analysed in Fig. 4B-D: LUX binding sites (LBS, B, GATWCG), G-Boxes (C, CACGTG) and CCAAT Boxes (D, CCAAT).

#### Supplementary Figure 5

A) Diurnal expression of *LUC* driven in the empty vector control (*pnos::LUC* #4, #5) in LD conditions. Data was obtained as described in Fig. 5 and serves as negative control.

B) Diurnal expression pattern of *A. thaliana CO* promoter *LUC* fusion (*pCO::LUC*) compared to *CPM::pnos::LUC* #7 *CMM::pnos::LUC* #1 and *CDM::pnos::LUC* #2 and in LD conditions. Mean  $\pm$  SD after normalization to *PP2A* for technical triplicates and a biological replicate gave similar results.

C) Flowering time of *pCO::GFP::CO* constructs carrying 2.6kb or 2.1kb of *CO* promoter sequence introduced into the *co-2* mutant in the *A. thaliana Ler* accession. Flowering time as total leaf number was examined in homozygous T<sub>3</sub> transgenic lines. Asterisks (\*\**p*<0.001) indicate significantly later flowering of 2.1kb lines compared to 2.6kb lines.

D) Flowering time of *pCO::GFP::CO* constructs introduced into *co-2* mutant as shown in C. Two independent transgenic lines of 0.6kb are displayed and asterisks (\*\**p*<0.001) indicate significantly earlier flowering compared to *co-2* mutant control.

E) Chemiluminescence of LUCIFERASE in 10 day old LD grown seedlings transformed with *CPM::pnos::LUC* #4, *CMM::pnos::LUC* #2 and *CDM::pnos::LUC* #4 compared to empty vector control (*pnos::LUC* #5).

#### Supplementary Figure 6

Selected sequence alignments of homologous regions of *CO* promoter as displayed in Fig 4A in the indicated species. *Conserved Proximal Motif (CPM)*, *Conserved Middle Motif (CMM)* and *Conserved Distal Motif (CDM)* were deduced from this alignment (Fig. 4A). Length and position of the Motifs is indicated. Identified *cis*-elements in *A. thaliana* are represented

(CCAAT-Box, DOF, G-Box, LUX binding site: LBS, TCP). Asterisks indicate 100% base pair conservation between all 10 Brassicaceae *CO* promoters

### **Supplementary Figure 7**

mRNA levels in LD (A, C, E) or SD (B, D, F) grown *A. thaliana* seedlings comparing Col-0 and *cdf1235* mutant for *CO* (A, B), *COL1* (C, D) and *COL2* (E, F). Mean +/- SD of two biological experiments after normalization to *PP2A* levels.

### **Supplementary Figure 8**

*CO* (A), *COL1* (B) or *COL2* (C) mRNA levels of LD grown *A. thaliana* seedlings either kept in LD (Light) or shifted to dark before light on (Dark). Mean +/- SD after normalization to *PP2A* for technical triplicates and a biological replicate gave similar results

## Supplementary Figures

Supplementary Figure 1

A

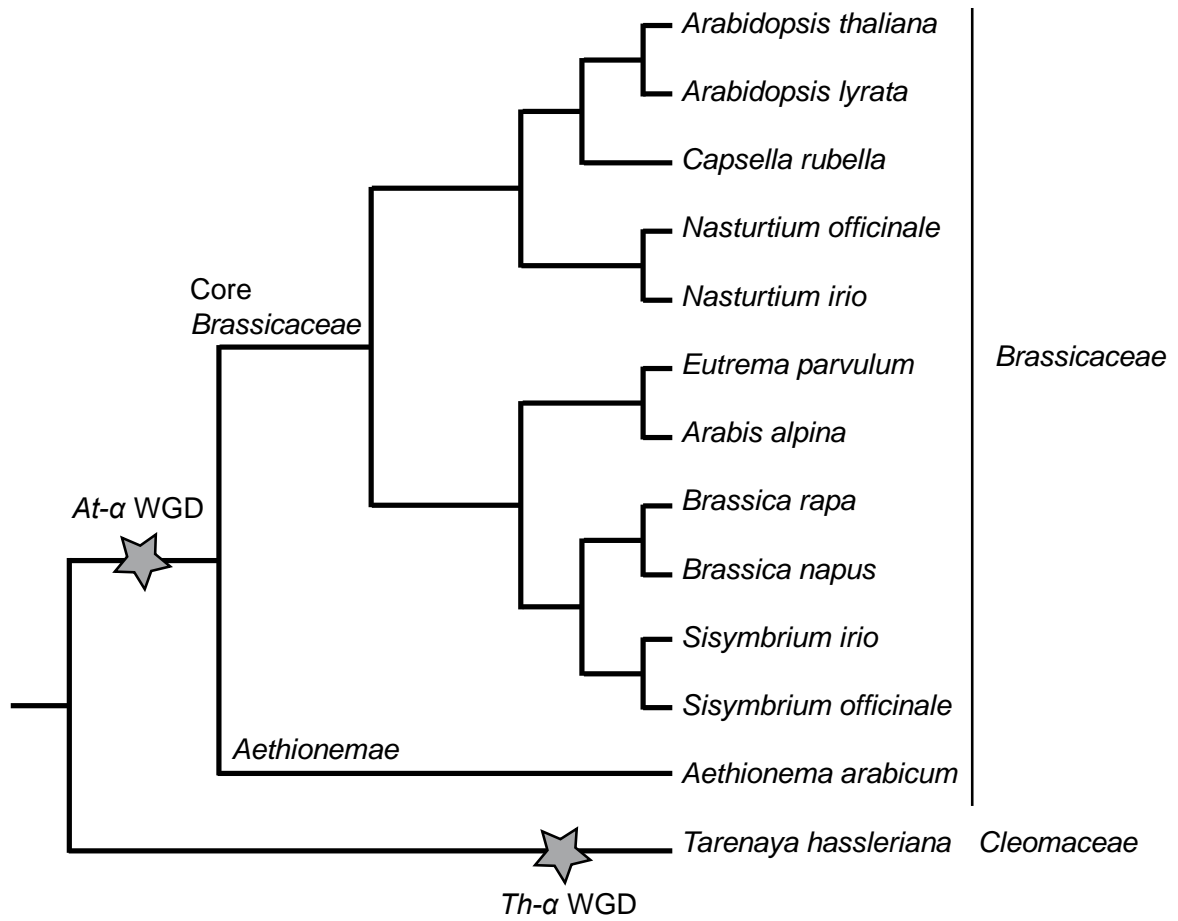

Supplementary Figure 2

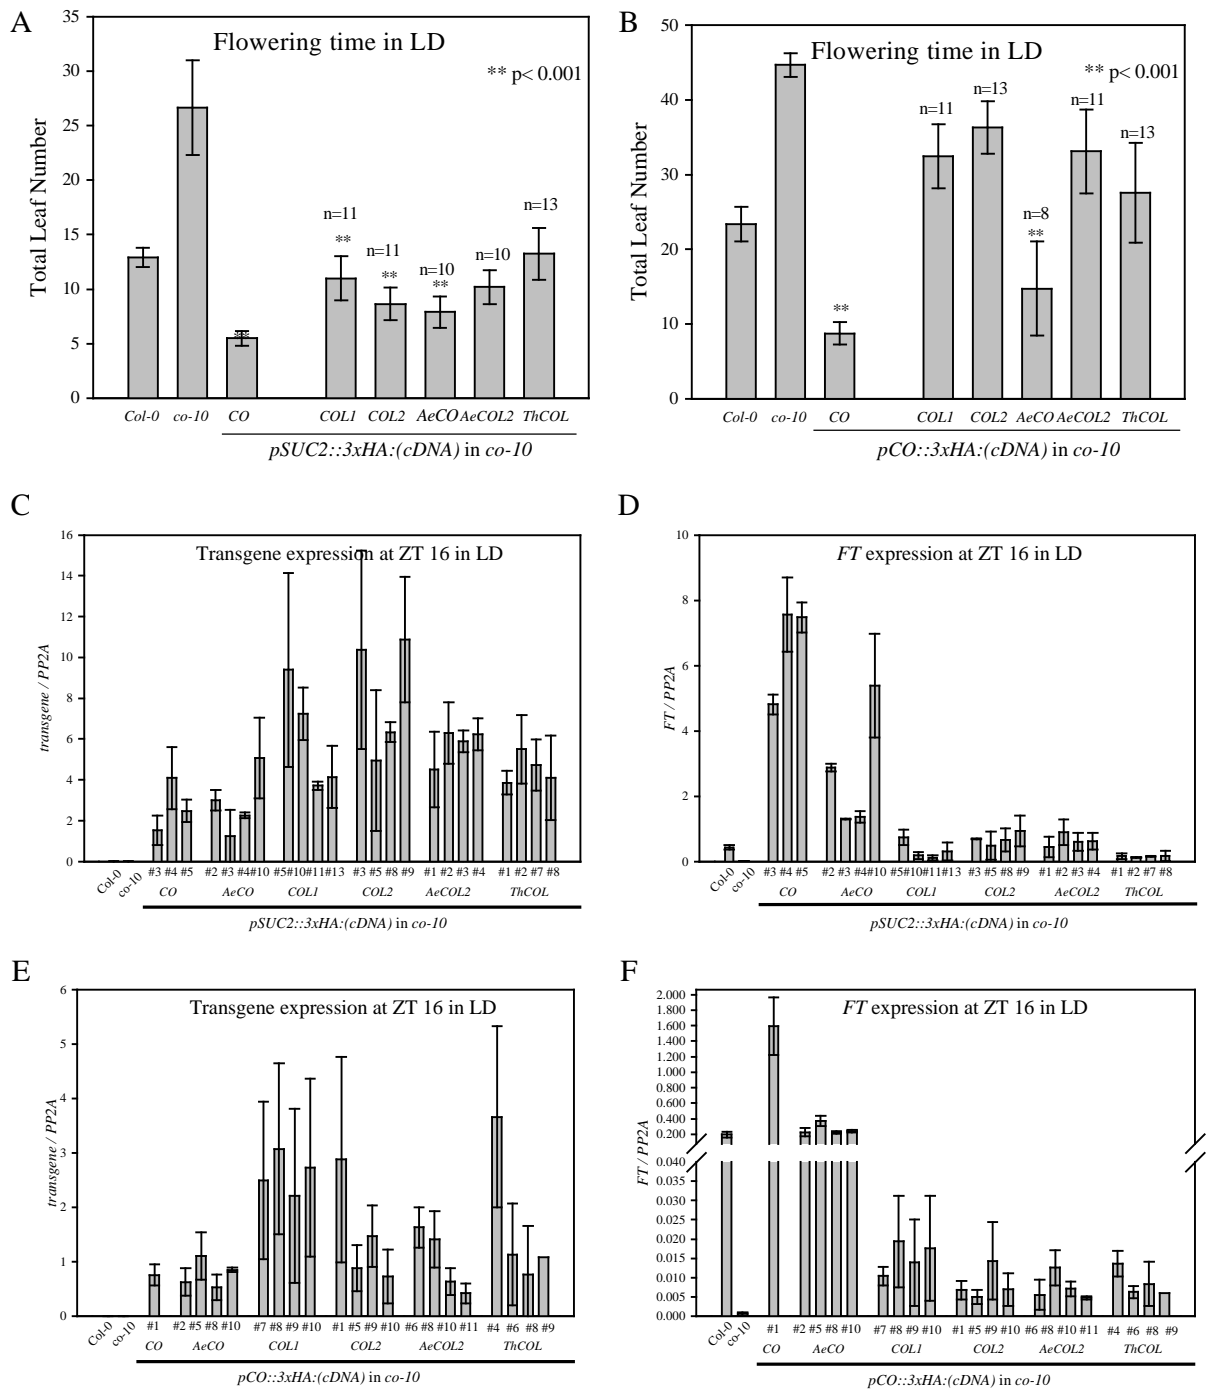



Supplementary Figure 3

A

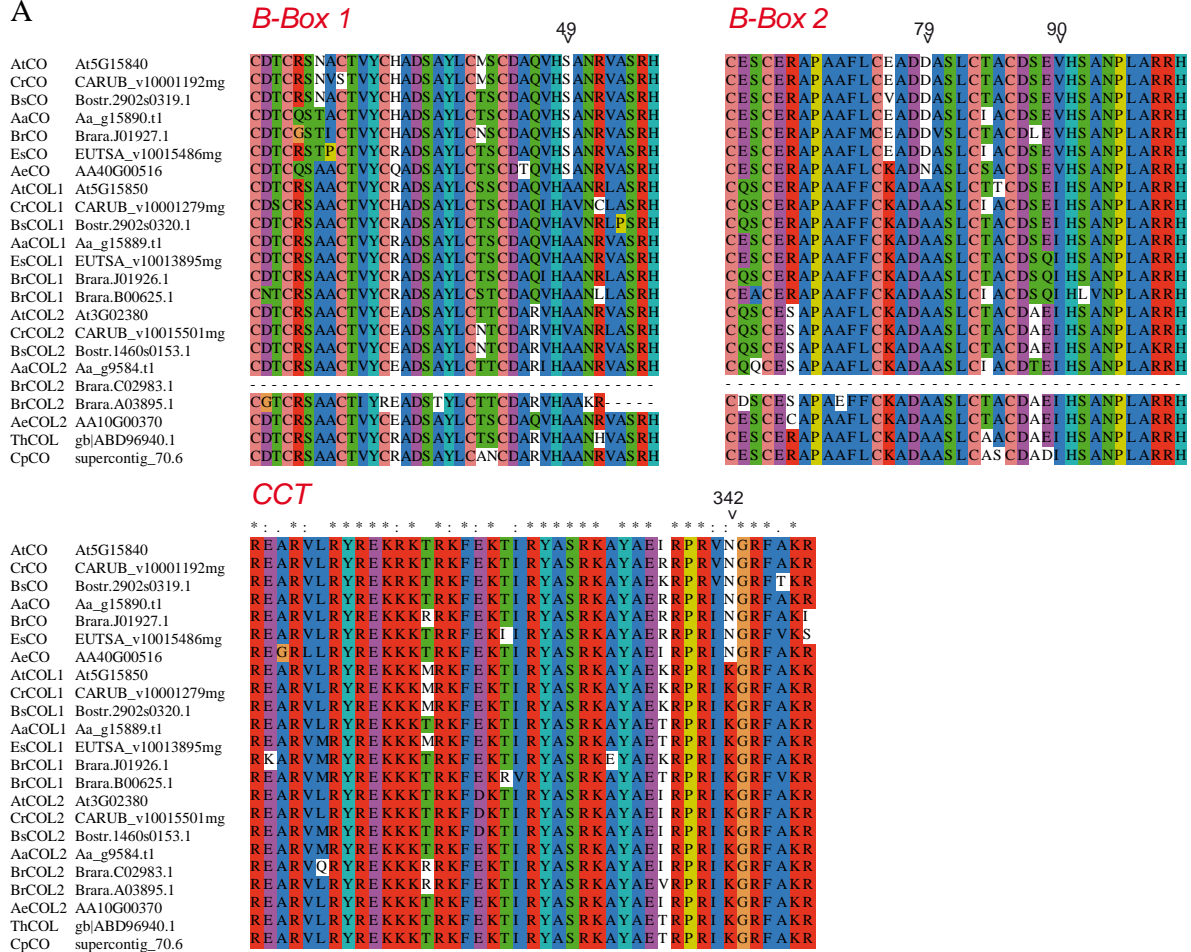

B

| Gene name     |               | $d_s$ | $d_n$ | $d_n/d_s$ |
|---------------|---------------|-------|-------|-----------|
| <i>AtCO</i>   | <i>ThCOL</i>  | 0.726 | 0.194 | 0.267     |
| <i>AeCO</i>   | <i>ThCOL</i>  | 0.855 | 0.183 | 0.214     |
| <i>AtCOL1</i> | <i>ThCOL</i>  | 0.772 | 0.196 | 0.254     |
| <i>AtCOL2</i> | <i>ThCOL</i>  | 0.774 | 0.162 | 0.210     |
| <i>AeCOL2</i> | <i>ThCOL</i>  | 0.714 | 0.137 | 0.192     |
| <i>AtCO</i>   | <i>AtCOL1</i> | 0.457 | 0.198 | 0.433     |
| <i>AtCO</i>   | <i>AtCOL2</i> | 0.679 | 0.191 | 0.281     |
| <i>AtCOL1</i> | <i>AtCOL2</i> | 0.808 | 0.193 | 0.239     |

C

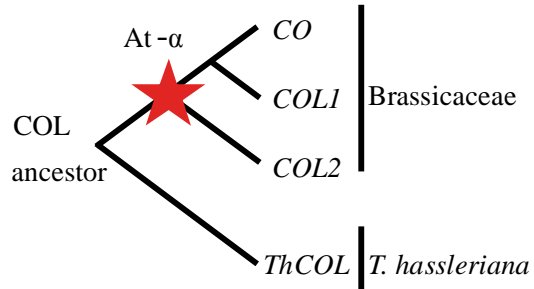

D

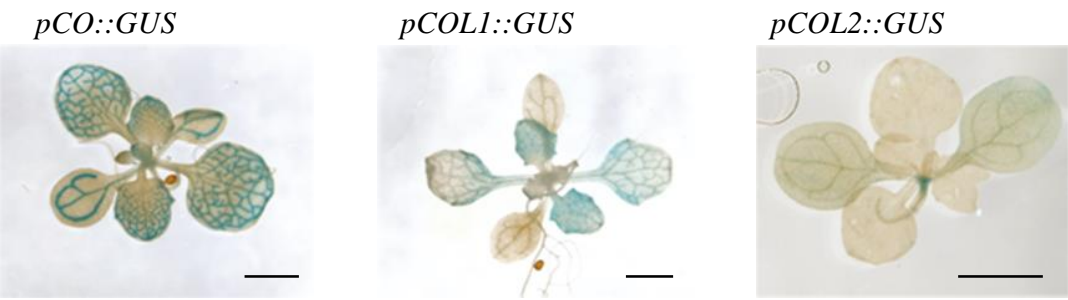

# Supplementary Figure 4

A

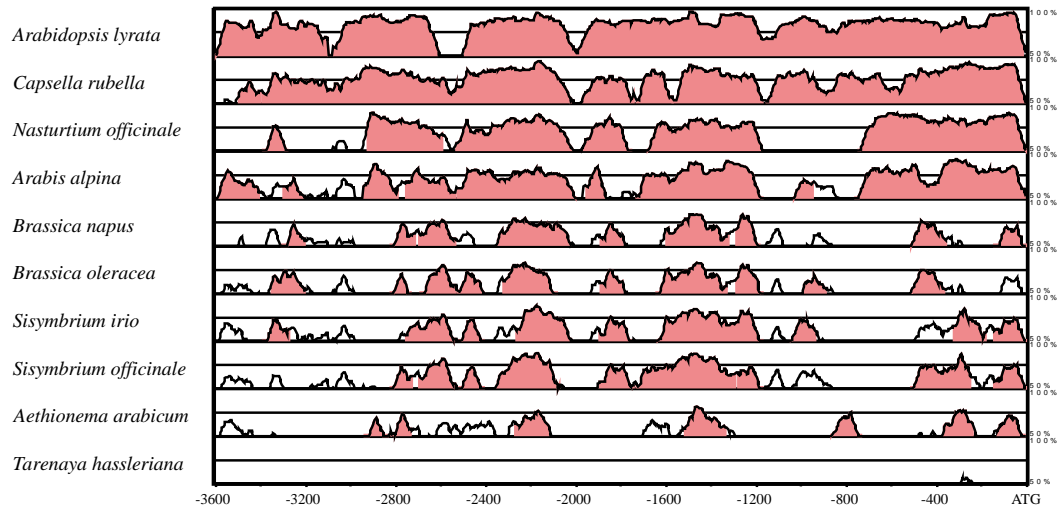

Base sequence: *Arabidopsis thaliana*

B

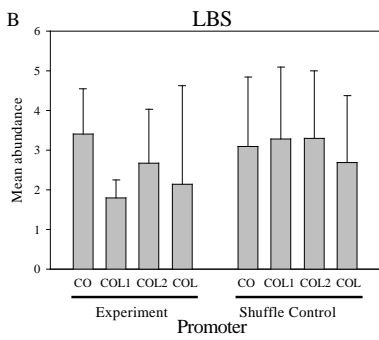

C

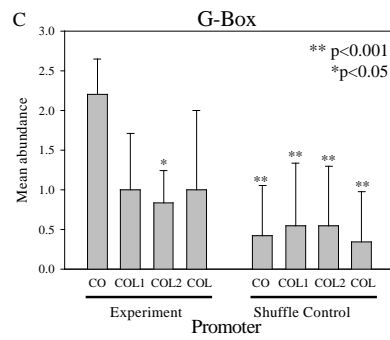

D

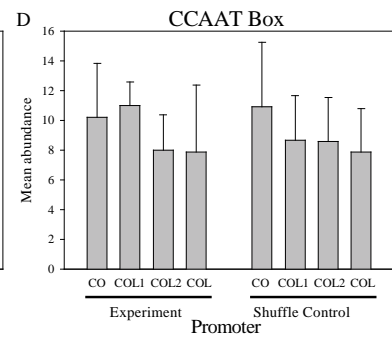

Supplementary Figure 5

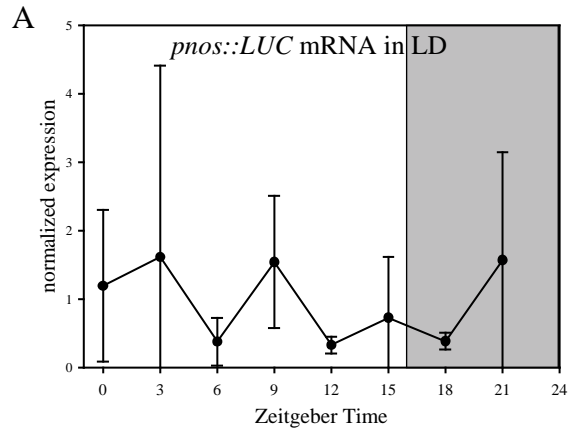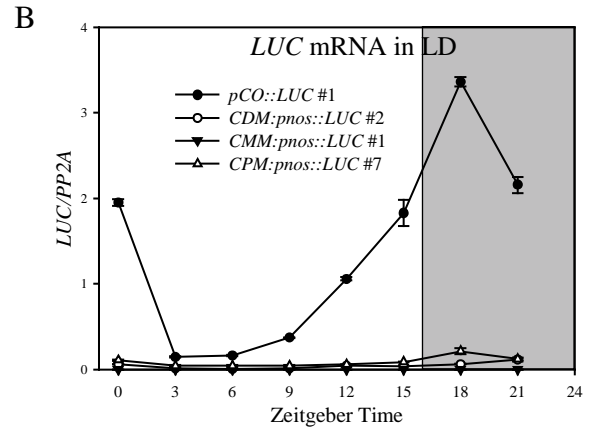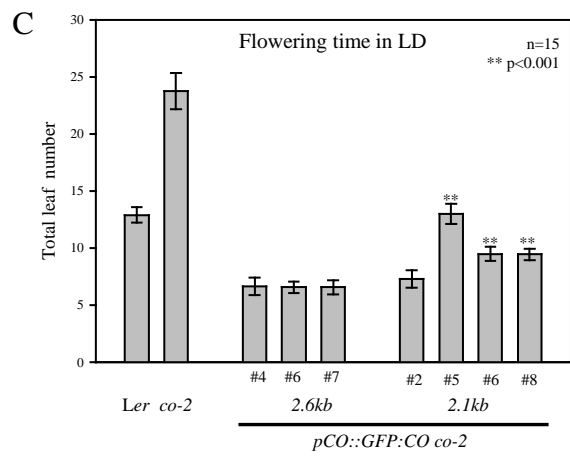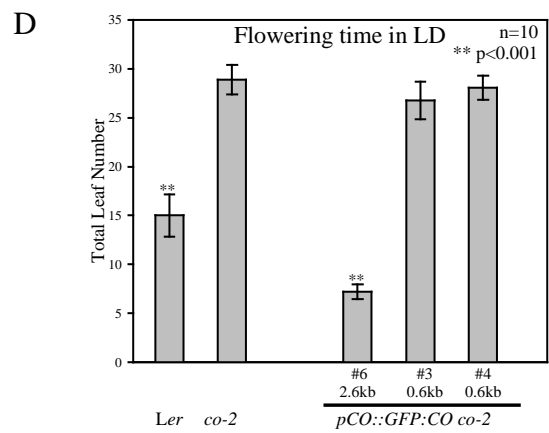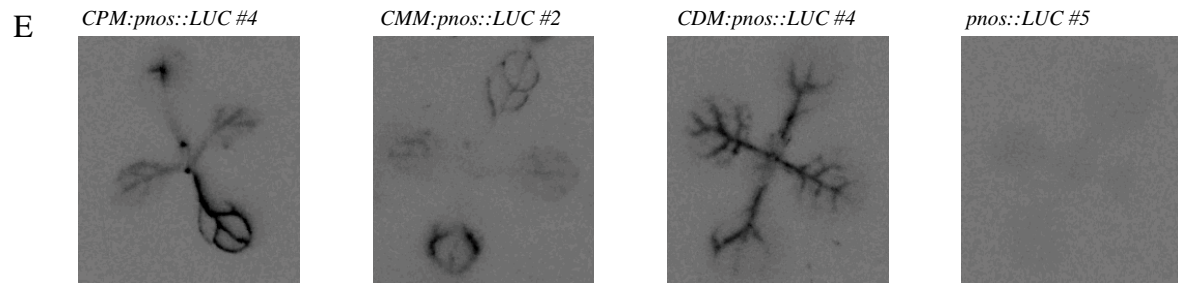



Supplementary Figure 7

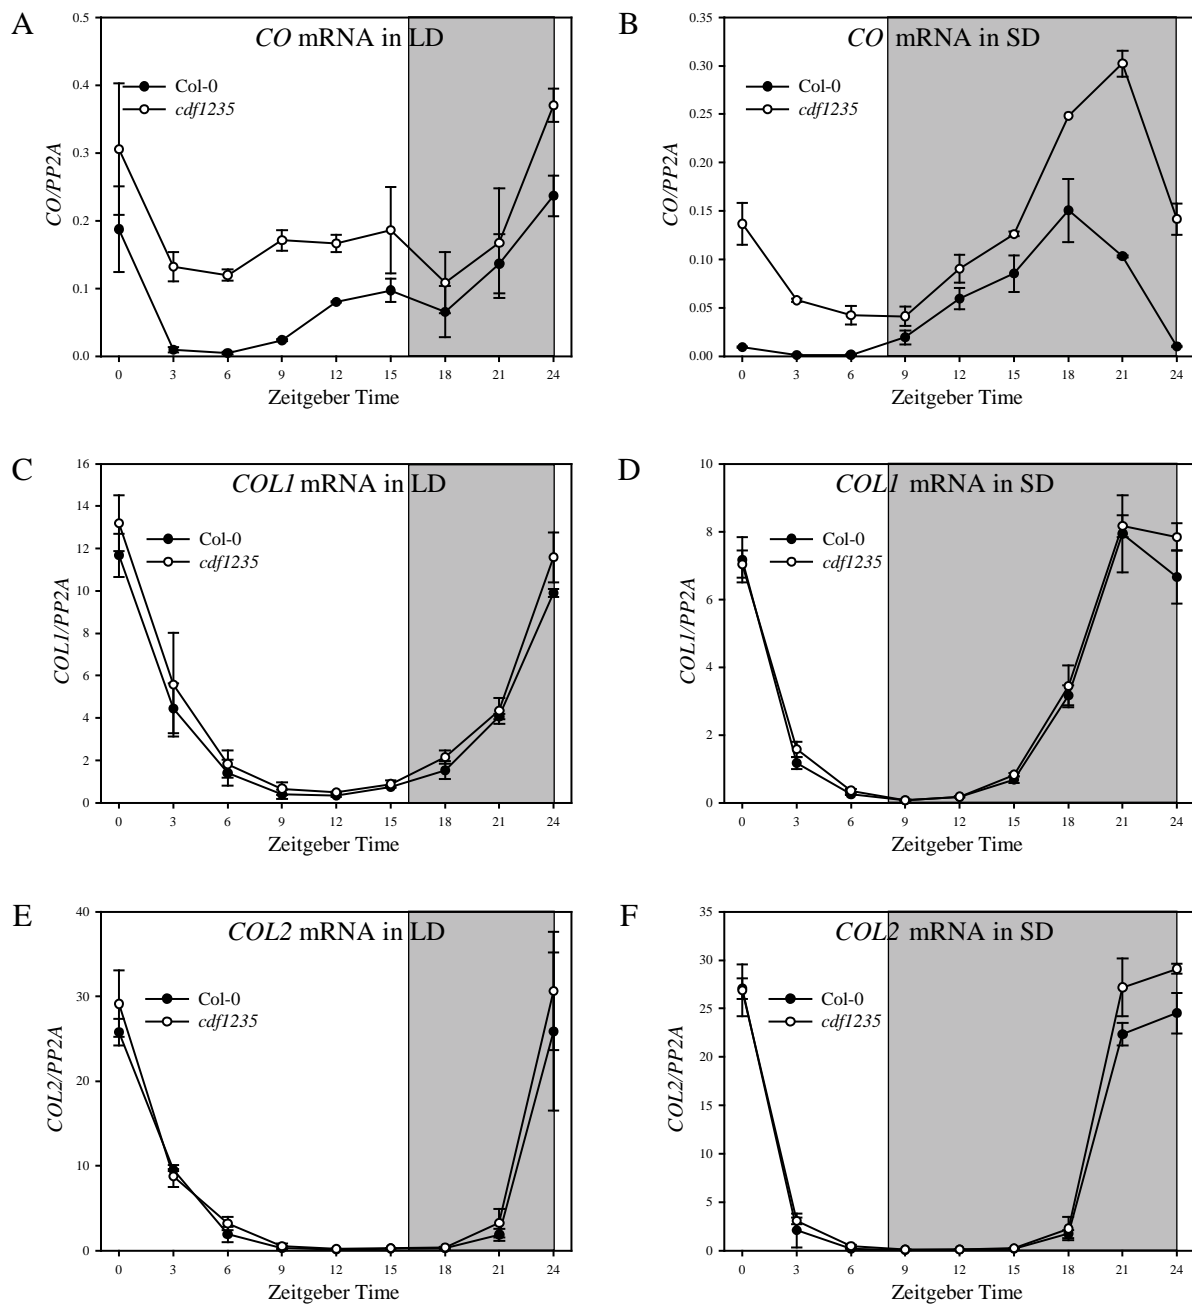

Supplementary Figure 8

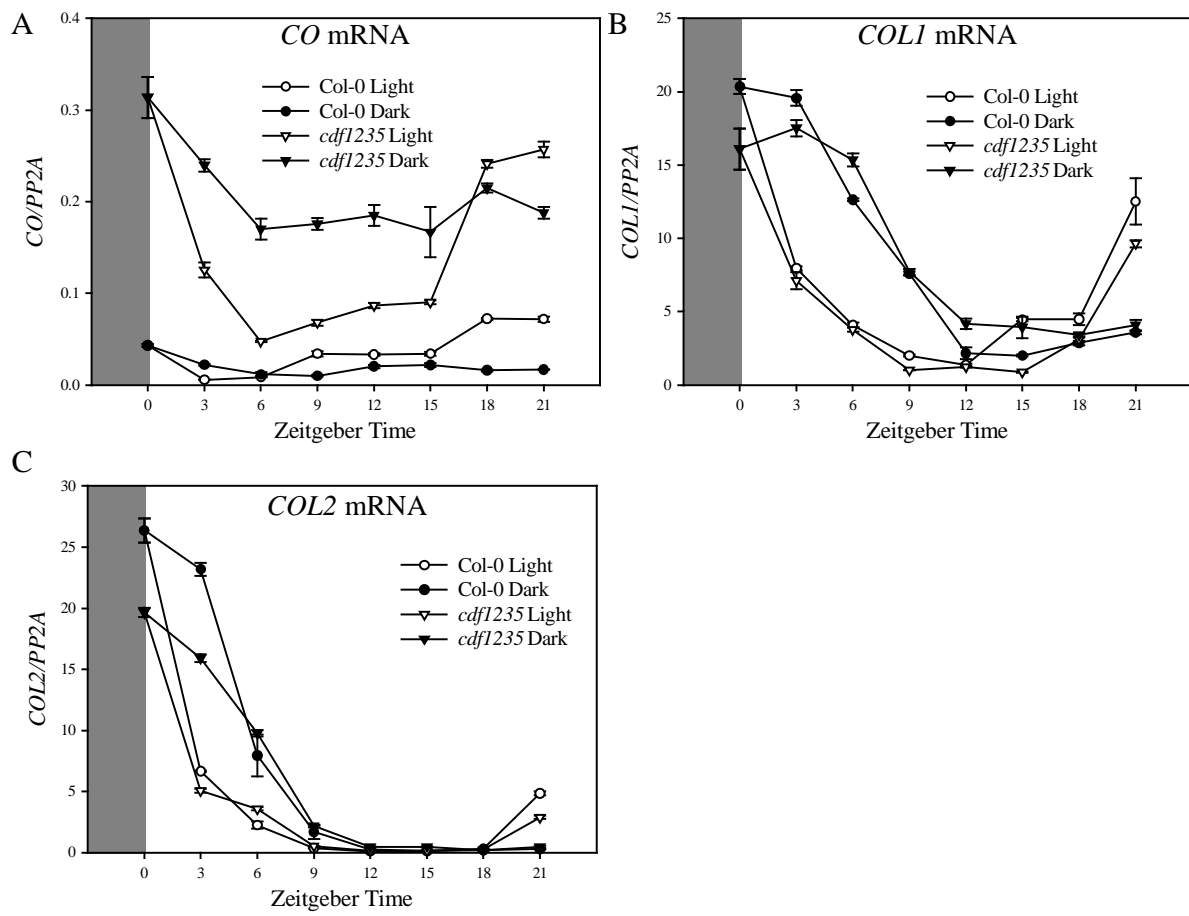

Supplement: supp_msv110_SupplementaryFiguresAndTables.pdf [file supp_msv110_SupplementaryFiguresAndTables.pdf]
